1 Conservation management strategy impacts inbreeding and genetic load  
2 in scimitar-horned oryx

3 Emily Humble<sup>1</sup>, Martin A Stoffel<sup>2</sup>, Kara Dicks<sup>3</sup>, Alex D Ball<sup>3</sup>, Rebecca M Gooley<sup>4,5</sup>, Justin  
4 Chuyen<sup>6,7</sup>, Ricardo Pusey<sup>6</sup>, Mohammed al Remeithi<sup>6</sup>, Klaus-Peter Koepfli<sup>4,5</sup>, Budhan  
5 Pukazhenth<sup>5</sup>, Helen Senn<sup>3</sup>, Rob Ogden<sup>1</sup>

6 <sup>1</sup>Royal (Dick) School of Veterinary Studies and the Roslin Institute, University of Edinburgh,  
7 EH25 9RG, Edinburgh, UK

8 <sup>2</sup>Institute of Evolutionary Biology, School of Biological Sciences, University of Edinburgh,  
9 Edinburgh, EH9 3FL, UK

10 <sup>3</sup>RZSS WildGenes, Conservation Department, Royal Zoological Society of Scotland,  
11 Edinburgh, EH12 6TS, UK

12 <sup>4</sup>Smithsonian-Mason School of Conservation, George Mason University, Front Royal, VA  
13 22630 USA

14 <sup>5</sup>Smithsonian's National Zoo and Conservation Biology Institute, Center for Species Survival,  
15 Front Royal, Virginia 22630 and Washington, D.C. 20008 USA

16 <sup>6</sup>Terrestrial & Marine Biodiversity Sector, Environment Agency – Abu Dhabi, United Arab  
17 Emirates

18 <sup>7</sup>US Fish and Wildlife Service, Colorado, USA

19 **Corresponding Author:**

20 Emily Humble, Royal (Dick) School of Veterinary Studies and the Roslin Institute

21 University of Edinburgh, EH25 9RG, UK

22 Phone: 0131 506 210, Email: [emily.humble@ed.ac.uk](mailto:emily.humble@ed.ac.uk)

23 **Keywords:**

24 *Ex-situ* populations, runs of homozygosity (ROH), deleterious mutations, reintroduction,  
25 effective population size, antelope conservation

## 26 **Abstract**

27 In an age of habitat loss and overexploitation, small populations, both captive and wild, are  
28 increasingly facing the effects of isolation and inbreeding. Genetic management has therefore  
29 become a vital tool for ensuring population viability. However, little is known about how the  
30 type and intensity of intervention shape the genomic landscape of inbreeding and genetic  
31 load. We address this using whole genome sequence data of scimitar-horned oryx (*Oryx*  
32 *dammah*), an iconic antelope that has been subject to contrasting management strategies  
33 since it was declared extinct in the wild. We show that unmanaged populations are enriched  
34 for long runs of homozygosity (ROH) and have significantly higher inbreeding coefficients than  
35 managed populations. These patterns were associated with a partial deficit of highly  
36 deleterious mutations but a considerable excess of weakly deleterious mutations. These  
37 findings emphasise the risks associated with multiple generations of inbreeding and highlight  
38 the complex dynamics of mutation accumulation and purging in captivity. As wildlife  
39 management strategies continue to diversify, our study reinforces the importance of  
40 maintaining genome-wide variation in vulnerable populations and has direct implications for  
41 one of the largest reintroduction attempts in the world.

## 42 **Significance statement**

43 The preservation of genetic variation has long been recognised as a critical component of  
44 conservation management. However, recent observations in small and isolated populations  
45 have led some to challenge this paradigm. We investigate the impact of contrasting  
46 management strategies on the genomic landscape of inbreeding and genetic load in captive  
47 populations of scimitar-horned oryx. We reveal how several decades of management have  
48 prevented the formation of long runs of homozygosity and buffered the impacts of deleterious  
49 mutations. Our findings validate consensus thinking on the importance of genome-wide  
50 variation for population viability and have direct implications for future management of  
51 threatened species.

## 52 Main text

### 53 Introduction

54 Captive populations have become an essential insurance against extinctions in the wild (1).  
55 However, due to inbreeding and drift, they are intrinsically vulnerable to reduced genetic  
56 variation and the expression of partially recessive deleterious mutations (2–6). It is therefore  
57 of paramount importance that appropriate plans are in place to safeguard their potential as  
58 source populations. *Ex-situ* management strategies fall along a continuum from high-intensity  
59 pedigree-based breeding (7), to low-intensity pedigree-free group management (8, 9), to a  
60 complete absence of breeding intervention whatsoever. Empirical evidence on how these  
61 approaches influence the combined landscape of inbreeding and deleterious variation is  
62 limited (10, 11). As wildlife management strategies begin to diversify (12–15), there is a  
63 pressing need to leverage current genomic techniques to validate consensus thinking on  
64 maximising genetic diversity and minimising inbreeding in captivity and beyond (16–18).

65 Alongside this, recent debate on the significance of neutral genetic variation in conservation  
66 biology has raised practical considerations for sourcing populations for restorations (19–23).  
67 For example, an increasing number of studies are uncovering genomic evidence for purging  
68 in the wild (24–29), some of which have used this to challenge the small population paradigm  
69 (25, 26). Furthermore, simulation-based studies on the interaction between effective  
70 population size, genetic variation and extinction risk have called for more emphasis on  
71 functional genomic variation in genetic rescue attempts (21, 22). These observations go  
72 against decades of empirical and theoretical work in favour of maximising genetic variation to  
73 enhance population viability (30–33) including recent studies highlighting the complex  
74 dynamics of deleterious mutation frequencies in small populations (34–38). Founder selection  
75 for translocations rests on a complex set of considerations, with genetics making up only one  
76 component (39). In most cases, conservation practitioners will favour a unifying strategy to  
77 minimise risk and maximise return (40–42). In light of this, empirical data on the patterns of  
78 inbreeding and deleterious mutations in species undergoing active conservation management  
79 is urgently required.

80 *Ex-situ* populations of scimitar-horned oryx provide an excellent opportunity to evaluate the  
81 genomic consequences of management in the context of a global reintroduction. This iconic  
82 antelope was once widespread across North Africa, yet during the 20<sup>th</sup> century, hunting and  
83 land-use competition led to their rapid population decline and eventual extinction from the wild  
84 (43). Prior to disappearing, captive populations had already been established from what is

85 thought to be less than 100 animals originating from Chad in the 1960s (43). In the following  
86 years, the *ex-situ* population has grown to reach approximately 15,000 individuals (44).  
87 Around 1,000 of these are held within coordinated breeding programmes, but the vast majority  
88 are held in collections in places like Texas and the Arabian Peninsula where little to no genetic  
89 management takes place. Crucially, the scimitar-horned oryx is now being reintroduced back  
90 into its former range and *ex-situ* populations with varying management strategies have been  
91 used to source individuals for release. Here, we use runs of homozygosity (ROH) and  
92 predicted deleterious mutations to evaluate the impacts of captive-breeding practices on  
93 inbreeding and genetic load in scimitar-horned oryx, and discuss the implications for its  
94 ongoing management.

## 95 **Results**

96 We generated whole-genome sequence data for 49 scimitar-horned oryx from four *ex-situ*  
97 populations. Two of these, the EAZA *Ex situ* Programmes (EEP,  $n = 8$ ) and the USA ( $n = 17$ ),  
98 represent captive populations where genetic management practices are in place. The USA  
99 population comprised individuals from both privately owned ranches and institutions within the  
100 AZA Species Survival Plan® (SSP). The remaining populations from the Environment Agency  
101 – Abu Dhabi originate from two genetically unmanaged collections in the United Arab Emirates  
102 (EAD A:  $n = 9$  and EAD B:  $n = 15$ ). Census sizes for the EEP and SSP population are  
103 approximately 619 and 223 respectively while those for EAD A and EAD B are approximately  
104 3,000 and 70. For further details on population origins, management strategies and sampling  
105 approach, please refer to the Supplementary Material.

106 High coverage sequencing (~15X) was performed for 20 of the individuals and the remaining  
107 29 were sequenced at a lower depth (6–8X, Table S1). Sequencing reads were mapped to  
108 the scimitar-horned oryx reference genome (45) and to account for coverage biases, SNPs  
109 and genotype likelihoods were called after downsampling high coverage individuals (see  
110 Methods for details). Analysis of population structure using NGSadmix and PCAngsd detected  
111 differentiation between the four sampling groups (Figures S2–4). Individual admixture  
112 proportions highlighted two major ancestral source populations (Figures S2A), with further  
113 hierarchical structure being resolved up to values of  $K=4$  (Figures S2B and S3), corresponding  
114 to the four *ex-situ* groups. PCA distinguished EEP and USA populations as discrete clusters  
115 along PC2 and PC3, while EAD A and EAD B clustered separately along PC1 (Figure S4).

## 116 **Levels of inbreeding across management strategies**

117 To investigate how genomic patterns of inbreeding vary with management strategy, we  
118 examined the ROH landscape across individuals (Figure 1). The average number and total  
119 length of ROH was 247 (min = 65, max = 638) and 2.0 Mb (0.5–22.0 Mb) respectively, which  
120 on average spanned 20% of the autosomal genome (min = 0.03, max = 0.55, Figure 1A and  
121 Figure S6). Oryx from managed populations had significantly lower inbreeding coefficients  
122 ( $F_{ROH}$ ) than oryx from unmanaged populations ( $\beta = -0.19$ , 95% CI = -0.24–-0.14,  $P = 6.43 \times 10^{-9}$ ,  
123 Figure 1A). This pattern was driven by both the number and length of ROH, the former being  
124 almost three times higher in the most inbred population than in the least inbred population  
125 (Figure 1B and Figure S7).

126

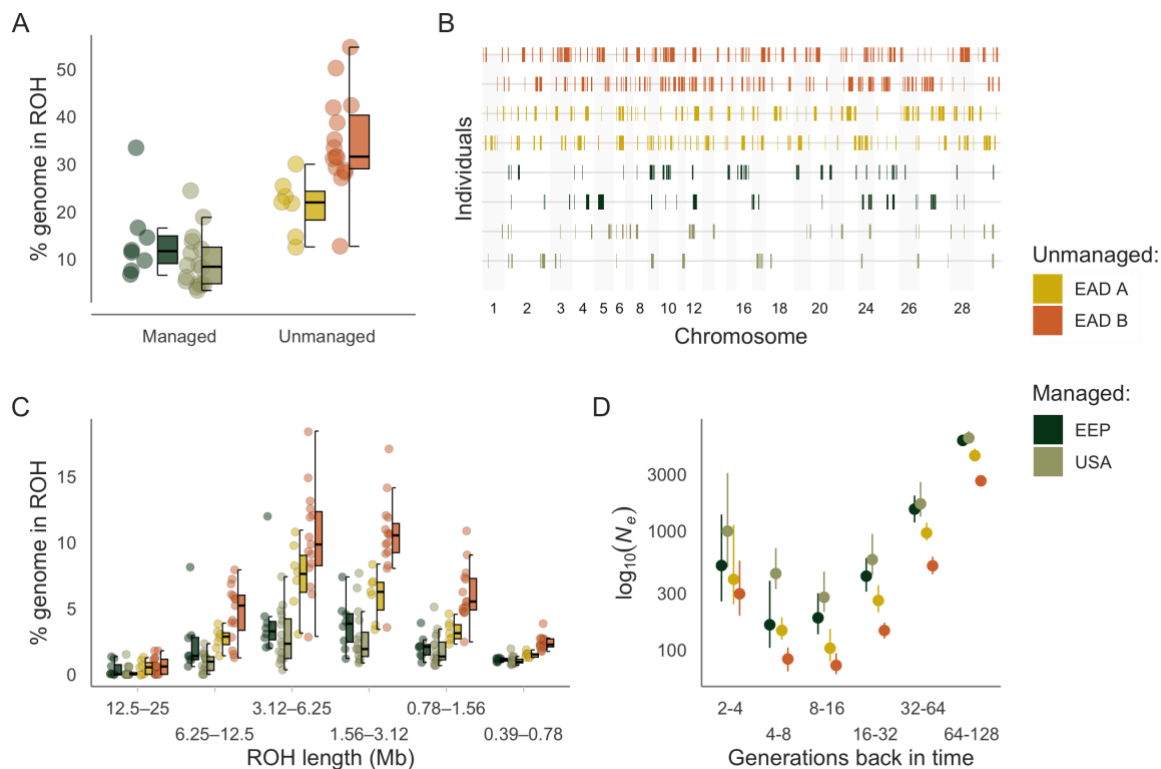

127 **Figure 1. Runs of homozygosity (ROH) landscape across contrasting management strategies of**  
 128 **scimitar-horned oryx. (A)** Distribution of  $F_{ROH}$  among scimitar-horned oryx management strategies.  
 129 Values were multiplied by 100 to reflect the percentage of the autosomal genome in ROH. Centre lines  
 130 of boxplots reflect the median, bounds of the boxes reflect the 25<sup>th</sup> and 75<sup>th</sup> percentile and upper and  
 131 lower whiskers reflect the largest and smallest values. **(B)** ROH in the two individuals with intermediate  
 132 inbreeding coefficients  $F_{ROH}$  from each population. **(C)** Distribution of ROH within different length  
 133 classes. Data points represent the percentage of ROH of a given length within an individual's autosomal  
 134 genome. **(D)** Effective population size estimates inferred from the mean  $F_{ROH}$  in a population for a given  
 135 time-period (see Methods for details). Error bars represent 95% bootstrap confidence intervals.

### 136 ROH length distribution and recent demography

137 We also observed variation in the abundance of ROH across different length classes. There  
 138 was a steep decrease in frequency of ROH above lengths of around 6.25 Mb (Figure 1C).  
 139 ROH longer than this made up a relatively small fraction of the genome, reaching a minimum  
 140 average frequency of 0.4% between 12.5–25 Mb. ROH between 3.12–6.25 Mb had the  
 141 highest frequency, making up on average 6.2% of an individual's genome. This pattern of  
 142 abundance was observed in each population however there was variation in absolute  
 143 proportions across individuals. For example, the most abundant length class 3.12–6.25 Mb  
 144 made up on average only 3% of the genome in the least inbred population, USA, while it  
 145 comprised on average 10% in the most inbred population, EAD B (Figure 1C). Interestingly,

146 long ROH >12.5 Mb which are likely the result of recent inbreeding, were identified in less than  
147 30% of individuals from managed populations, yet were present in over 60% of individuals  
148 from unmanaged populations.

149 As ROH lengths decrease, their underlying haplotypes are expected to have originated from  
150 ancestors further back in time (Thompson 2013). The abundance of ROH in different length  
151 classes can therefore provide insights into past changes in effective population size ( $N_e$ ) (46,  
152 47). In line with this, our estimates of  $N_e$  based on individual inbreeding coefficients were  
153 proportional to patterns of ROH abundance (Figure 1D).  $N_e$  declines to reach a minimum of  
154 around 150 individuals between 8–16 generations ago, after which it shows a steady increase  
155 towards the present day. Interestingly, despite small census sizes, managed populations had  
156 higher  $N_e$  estimates across all time periods than unmanaged populations (mean  $N_e$ : USA =  
157 1,672, EEP = 1,429 versus EAD A = 1,028, EAD B = 625). These patterns were reflected in  
158 estimates of mean pairwise nucleotide diversity which were also higher in managed (USA =  
159  $0.46 \times 10^5$ , EEP =  $0.44 \times 10^5$ ) than unmanaged populations (EAD A =  $0.42 \times 10^5$ , EAD B =  
160  $0.27 \times 10^5$ ).

### 161 **Mutation load landscape across management strategies**

162 We next investigated how genetic load varies across management strategies using two  
163 approaches, both based on putative deleterious variants identified using annotation-based  
164 methods. As the overall patterns were qualitatively similar across two variant effect prediction  
165 programs (Figure S8), results using annotations from SnpEff are presented here. We first  
166 explored the present and potential impacts of putatively deleterious mutations by estimating  
167 two components of genetic load; inbreeding and drift load (Bertorelle *et al.* 2022, see Methods  
168 for details). Inbreeding load corresponds to the potential reduction in population fitness due to  
169 the burden of recessive deleterious mutations that may become homozygous through  
170 inbreeding. It was approximated as the absolute number of missense and loss of function  
171 heterozygotes per individual. Drift load corresponds to a reduction in fitness of a population  
172 due to the increased frequency and fixation of deleterious mutations. It was approximated as  
173 the absolute number of alternative missense and loss of function homozygotes per individual.

174 Inbreeding load for both missense and loss of function mutations was consistently higher in  
175 managed than unmanaged populations (Missense:  $\beta = 1079$ , 95% CI = 769–1390,  $P = 1.12 \times 10^{-8}$ ,  
176 LoF:  $\beta = 21.7$ , 95% CI = 12.7–30.6,  $P = 1.51 \times 10^{-5}$ , Figure 2A–B). As expected, this pattern  
177 inversely tracked overall inbreeding levels, where individuals with lower inbreeding coefficients  
178 had a larger number of heterozygotes at missense and loss of function sites (Figure S9). In  
179 direct contrast, the drift load for weakly deleterious missense mutations was lower in managed

180 populations than in unmanaged groups ( $\beta = -267$ , 95% CI = -398--137,  $P = 1.65 \times 10^{-4}$ , Figure  
 181 2C). Interestingly, the drift load for highly deleterious loss of function mutations displayed no  
 182 difference across management strategies, with similar numbers of alternative homozygotes  
 183 present among individuals ( $\beta = 0.89$ , 95% CI = -3.07--4.86,  $P = 6.5 \times 10^{-1}$ , Figure 2D).

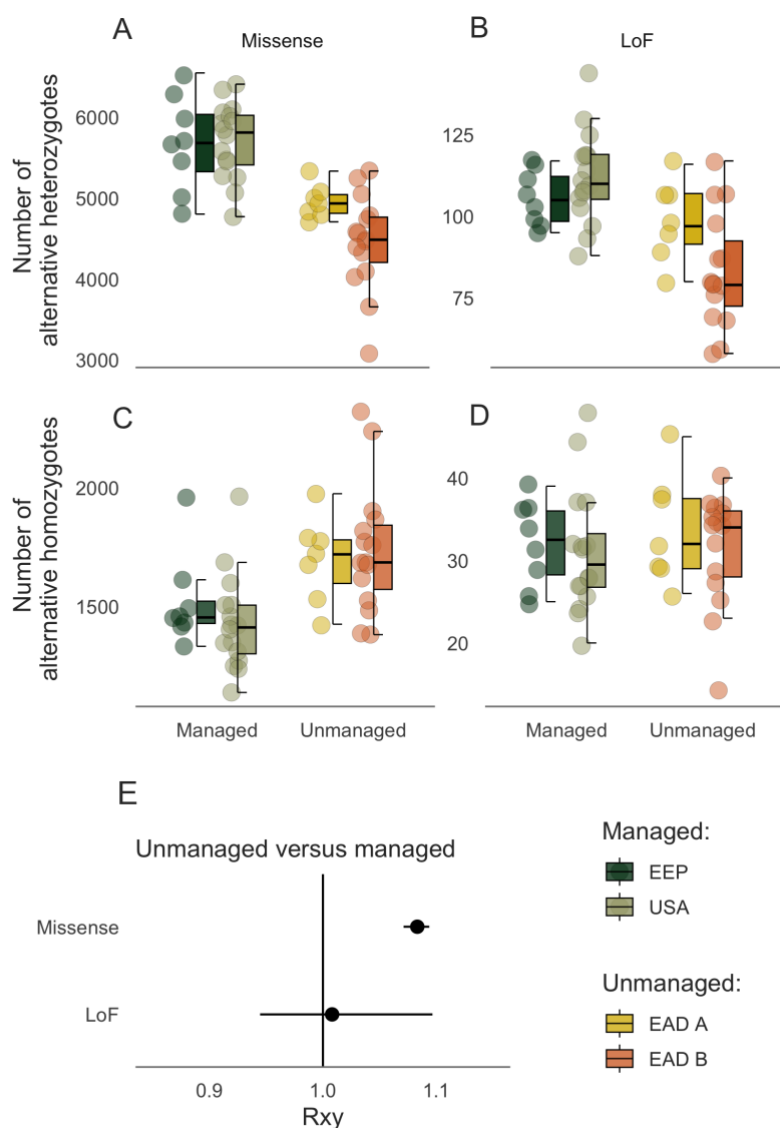

184 **Figure 2. Deleterious load landscape across contrasting management strategies of scimitar-**  
 185 **horned oryx based on SNPeff annotations.** Distribution of the number of heterozygotes per individual  
 186 (inbreeding load) for missense (A) and loss of function mutations (B) across management strategies.  
 187 Distribution of the number of alternative homozygotes per individual (drift load) for missense (C) and  
 188 loss of function (D) mutations across management strategies. (E) Relative number ( $R_{xy}$ ) of alternative  
 189 alleles at missense and loss of function sites.  $R_{xy} > 1$  indicates a relative frequency excess of a given  
 190 category of sites in unmanaged versus managed populations. Error bars represent 95% bootstrap  
 191 confidence intervals.



192 We next used the measure  $R_{xy}$  to determine whether there was an excess of putative  
193 deleterious mutations in one management strategy over another.  $R_{xy}$  compares the relative  
194 frequency of derived alleles within a given impact category and is standardised over a set of  
195 intergenic SNPs, making it robust to population-specific biases. Overall, unmanaged  
196 populations displayed a significant excess of missense mutations compared to the managed  
197 populations (Figure 2E), indicating an accumulation of weakly deleterious mutations in the  
198 unmanaged groups. In contrast, no difference in the frequency of highly deleterious loss of  
199 function mutations could be detected between the management groups (Figure 2E).

## 200 Discussion

201 The scimitar-horned oryx was declared Extinct in the Wild in 2000, yet the species has  
202 persisted *ex-situ*. Understanding how management shapes the genomic landscape of  
203 inbreeding and genetic load is essential for improving species viability. We used whole  
204 genome resequencing data to characterise runs of homozygosity and deleterious mutations  
205 in scimitar-horned oryx populations undergoing contrasting management strategies. Our study  
206 highlights the complex dynamics between inbreeding, genetic load and population size and  
207 has broad-reaching implications for practical conservation management.

208 We first demonstrated how signatures of recent population history can be identified in the  
209 genomes of present-day animals. Across *ex-situ* oryx populations, both managed and  
210 unmanaged, we observed a peak in ROH abundance between 3.12–6.25 Mb. Although it is  
211 not possible to precisely estimate the time to the most recent common ancestor (MRCA) when  
212 ROH are inferred using physical positions (49), ROH of this size are expected to originate  
213 from haplotypes approximately 8–16 generations ago (50). This shift in abundance indicates  
214 a smaller population size around this time-period which we could reconstruct with our  
215 measures of  $N_e$ . Interestingly, assuming a generation time of around seven years (44), this  
216 directly corresponds to the mid 20<sup>th</sup> century when oryx were close to extinction in the wild and  
217 when *ex-situ* populations were founded (15, 43). These findings highlight the power of ROH  
218 for inferring the strength and timing of recent bottlenecks and for placing contemporary  
219 patterns of nucleotide diversity into a historical context.

220 The overall pattern of ROH abundance was qualitatively similar across populations yet the  
221 absolute proportion of the genome in ROH was considerably lower in managed than  
222 unmanaged populations for all length classes. Long ROH are indicative of recent inbreeding  
223 because recombination has had little opportunity to break up haplotypes (51–54). The relative  
224 absence of long ROH therefore strongly indicates that close inbreeding is uncommon in

225 managed populations, which work to mitigate this process. Furthermore, the smaller  
226 proportion of short ROH suggest these populations also have lower levels of background  
227 relatedness (53, 55). Although historic data on the origins of the unmanaged populations are  
228 lacking (15), it is not unreasonable to expect a higher level of relatedness among founder  
229 individuals compared to those of breeding programmes. Overall, these findings reveal the  
230 genomic effects of multiple generations of inbreeding, while on the other hand demonstrate  
231 how 30–40 years of *ex-situ* management has been successful at maximising the genetic  
232 diversity of captive populations.

233 We next shed light on the relationship between inbreeding, diversity and deleterious mutations  
234 by exploring how proxies for genetic load compare across management strategies. At an  
235 individual level, we show that animals from collections employing genetic management  
236 practices have a higher inbreeding load for both missense and loss of function mutations than  
237 animals from unmanaged populations. Theory and simulations (23, 56, 57) predict that in large  
238 populations, higher frequencies of segregating deleterious mutations will lead to higher  
239 inbreeding load. This is in part due to being masked from the effects of purifying selection in  
240 populations with larger  $N_e$ , but also by genetic drift driving deleterious mutations to fixation in  
241 small populations. In line with this, we show that despite their small census sizes, managed  
242 populations of oryx have higher nucleotide diversity and effective population sizes than  
243 unmanaged collections.

244 The presence of segregating deleterious variation within insurance populations may be  
245 considered a concern for conservation management. Indeed, there has been recent debate  
246 surrounding the risks associated with sourcing individuals for restoration from large,  
247 genetically diverse populations, given the higher expected levels of masked load (21, 22).  
248 However, these concerns are unlikely to be relevant for restoration and reintroduction  
249 programs that follow established recommendations (39). Notably, as advised by IUCN/SSC  
250 guidelines, sourcing individuals from genetically differentiated populations, releasing large  
251 numbers of animals over extended time frames and maximising initial population growth rate  
252 all serve to increase genetic variation and prevent the inbreeding load from being expressed  
253 (19, 58–60). The scimitar-horned oryx reintroduction plan has followed these best practice  
254 guidelines having so far released over 250 animals over a five-year time-period, and in eight  
255 separate release batches. Consequently, the released population has now reached close to  
256 400 individuals, with over 150 calves born in the wild. Follow-up monitoring of the release  
257 herds will provide a rare opportunity to validate these efforts within the context of a large-scale  
258 reintroduction effort.

259 In addition to the inbreeding load, we also considered how drift load varies across populations.  
260 Several recent studies have demonstrated significant reductions in the relative number of  
261 highly deleterious mutations in small versus large (24–26, 29, 37) and in modern versus  
262 historical populations (27, 28), and attributed these differences to the effects of purifying  
263 selection. While we did not observe a complete reversal in the patterns of drift load for loss of  
264 function mutations, we did see a reduction in frequency relative to missense mutations in  
265 unmanaged collections. In small inbred populations, partially recessive deleterious mutations  
266 will be expressed as homozygotes thereby exposing them to the effects of purifying selection  
267 (62–64). However, as selection strength declines with decreasing  $N_e$ , fewer deleterious  
268 mutations are expected to be removed through purging (65, 66). In line with this, we also show  
269 that unmanaged collections have accumulated a considerable burden of weakly deleterious  
270 mutations compared to managed populations.

271 Recent studies distinguishing weakly and strongly deleterious mutations and different genetic  
272 load components have uncovered equivalent patterns in wild populations (34, 36, 38). Taken  
273 together, our results provide further support for the notion that the presence of purging of  
274 large-effect mutations does not imply the absence of inbreeding depression (19, 23). This is  
275 consistent with recent studies on a small population of Soay sheep (*Ovis aries*), where long-  
276 term fitness and genomic data revealed strong inbreeding depression caused largely by many  
277 weakly deleterious mutations (35, 67). Consequently, despite some evidence for purging,  
278 unmanaged populations of oryx are likely to carry a higher fitness cost associated with  
279 inbreeding. With regard to their long-term genetic management, this would imply a need for  
280 reciprocal transfer of individuals between *ex-situ* collections. Not only would this serve to  
281 reduce inbreeding, but would produce populations with enhanced genetic diversity for  
282 enabling adaptation to changing environmental conditions and for release back into the wild.  
283 As part of the World Herd approach (68), mixing of animals from multiple collections is now a  
284 key part of the scimitar-horned oryx reintroduction management strategy.

285 *Ex-situ* breeding and species reintroduction planning are ultimately exercises in risk  
286 management, with genetics making up only one component of a multifaceted set of  
287 considerations (39). Overall, our study provides empirical support for the value of genetic  
288 management of *ex-situ* populations and reinforces the risks associated with multiple  
289 generations of inbreeding. These findings advocate for a strategy in line with conventional  
290 wisdom to maintain genetic variation and maximise differentiation in captive populations and  
291 restoration programmes (7, 60, 69–72). While such actions will be possible using largely  
292 traditional measures of genetic variation, our study demonstrates how the application of whole  
293 genome sequencing in the context of *ex-situ* management has the power to resolve previously

294 unknown aspects of variation. We recognise that it is impractical to consider comprehensive  
295 genomic approaches for the genetic management of every species (73). Rather, we suggest  
296 the application of studies such as this to guide conservation breeding strategies across diverse  
297 taxa. When combined with best-practice guidelines, this approach will help lead to healthy  
298 populations, with the greatest chance of survival.

## 299 **Materials and methods**

### 300 **Sampling and sequencing**

301 Blood (in EDTA) and tissue (in 100% ethanol) samples were collected for whole genome  
302 resequencing from 49 scimitar-horned oryx representing four *ex-situ* populations: the EEP ( $n$   
303 = 8), USA ( $n = 17$ ), EAD A ( $n = 9$ ) and EAD B ( $n = 15$ ). The EEP and USA are captive  
304 collections undergoing genetic management practices, while EAD A and EAD B represent  
305 collections in the United Arab Emirates with no genetic management in place (Supplementary  
306 Methods). Total genomic DNA was extracted between one and five times per sample using  
307 the DNeasy Blood and Tissue Kit (Qiagen, Cat. No. 69504). Elutions were pooled and  
308 concentrated in an Eppendorf Concentrator Plus at 45°C and 1400 rpm until roughly 50  $\mu$ l  
309 remained. Library construction was carried out using the Illumina TruSeq Nano High  
310 Throughput library preparation kit (Illumina CA, UKA). Twenty samples from across all four  
311 populations were 150 bp paired-end sequenced on an Illumina HiSeq X Ten platform at a  
312 target depth of coverage of 15X. The remaining 29 samples from three of the populations were  
313 150 bp paired-end sequenced on an Illumina NovaSeq 6000 instrument at a target depth of  
314 coverage of 7X (Table S1).

### 315 **Read processing and alignment**

316 Sequence reads were assessed for quality using FastQC v0.11.7 (74) and trimmed for adaptor  
317 content using cutadapt v1.16 (75). Reads were then mapped to the scimitar-horned oryx  
318 reference genome assembly (*Oryx dammah* assembly version 1.1, Genbank accession  
319 number GCF\_014754425.2) using BWA MEM v0.7.17 (76) with default parameters.  
320 Unmapped reads were removed from the alignment files using SAMtools v1.9 (77).  
321 Alignments were then sorted, read groups added and duplicates removed using Picard Tools  
322 v2.18.16. This resulted in a set of 49 filtered alignment files, one for each of the resequenced  
323 individuals. To account for coverage variation in our data (78), we used SAMtools to  
324 downsample our 20 high coverage alignment files to approximately 6X, which was the average  
325 depth of coverage of our low coverage samples. All subsequent analyses were carried out on  
326 the set of alignments with comparable coverage.

## 327 **Variant calling and filtering**

328 Haplotype Caller and GenotypeGVCFs in GATK v3.8 (79) were used for joint genotyping  
329 across all samples. The resulting SNP data were filtered for biallelic sites using BCFtools v1.9  
330 (80). To obtain a high-quality set of variants we then used VCFtools (81) to remove loci with  
331 a quality score less than 30, a mean depth of coverage less than 5 or greater than 53, a  
332 genotyping rate less than 95% and a minor allele count less than 1. We removed SNPs  
333 originating from the X chromosome or any of the unplaced scaffolds within the assembly. One  
334 individual with a high relatedness score was dropped from subsequent analysis (Figure S1,  
335 see Supplementary Methods for details). The resulting SNP dataset contained over 10 million  
336 polymorphic sites with a genotyping rate of 98%.

## 337 **Population structure**

338 We characterised population structure using genotype likelihood based approaches in  
339 NGSadmix (82) and PCAngsd (83). Genotype likelihoods were first estimated from bam files  
340 in ANGSD (84) using the GATK model (-GL 2), inferring major and minor alleles (-  
341 doMajorMinor 1) and outputting only polymorphic sites (-SNP\_pval 1e-6) with data in at least  
342 60% of individuals (-minInd 30). We restricted this analysis to the 28 chromosome-length  
343 autosomes and included only regions with Phred quality and mapping scores over 30.  
344 Admixture proportions for the individuals in our dataset were calculated using NGSadmix. We  
345 performed admixture runs for ancestry clusters ranging from  $K=1-6$ , with ten runs for each  $K$ .  
346 The runs with the highest likelihood were plotted. The optimal  $K$  was identified based on the  
347 maximum value of the mean estimated  $\ln$  probability of the data (85) and the Delta  $K$  method  
348 (86). Two individuals with intermediate admixture proportions between EAD A and EAD B  
349 were dropped from further analysis (Figure S3, see Supplementary Methods for details). We  
350 next performed a principal components analysis (PCA) using PCAngsd with the default  
351 parameters. Eigenvectors were computed from the covariance matrix using R.

## 352 **ROH calling and individual inbreeding coefficients**

353 We used the filtered SNP genotypes to estimate inbreeding as the proportion of the genome  
354 in runs of homozygosity ( $F_{ROH}$ ). ROH were called with a minimum length of 500 kb and a  
355 minimum of 50 SNPs using the --homozyg function in PLINK v1.9 (87) and the following  
356 parameters: --homozyg-window-snp 50 --homozyg-snp 50 --homozyg-kb 500 --homozyg-gap  
357 1000 --homozyg-density 50 --homozyg-window-missing 5 --homozyg-window-het 3. We then  
358 calculated individual inbreeding coefficients  $F_{ROH}$  as the sum of the detected ROH lengths for  
359 each individual over the total autosomal assembly length (2.44 Gb). To explore the effect of  
360 management on inbreeding coefficients we ran linear models with  $F_{ROH}$  as the response  
361 variables and management strategy as the predictor variable. We also calculated  $F_{ROH}$  based

362 on ROH inferred using bcftools roh and the following parameters: --AF-dflt 0.16 (average  
363 minor allele frequency), -G 30 and -M 1.2 (cattle recombination rate, Mouresan *et al.* 2019).  
364 We observed a near-perfect correlation ( $r = 0.99$ ) with our PLINK-based estimates (Figure  
365 S5).

### 366 **ROH length distribution and recent demography**

367 To assess recent changes in oryx population size, we characterised the abundance of ROH  
368 in seven different length classes ( $\geq 25$ , 12.5–25, 6.25–12.5, 3.12–6.25, 1.56–3.12, 0.78–1.56  
369 and 0.39–0.78 Mb). Categories were calculated using the formula  $100/(2g)$  (50), and reflect  
370 the expected lengths of ROH when the underlying haplotypes have most recent common  
371 ancestors  $< 2$ , 2–4, 4–8, 8–16, 16–32, 32–64 and 64–128 generations ago respectively. These  
372 generations were chosen to capture the time-period during which the wild population of oryx  
373 went extinct and captive populations were established. As there is no linkage map for the oryx,  
374 physical map lengths as opposed to genetic map lengths were used. For each length class,  
375  $F_{ROH}$  was calculated as the sum of the detected ROH lengths for each individual over the total  
376 autosomal assembly length (2.44 Gb). We then used individual measures of  $F_{ROH}$  to infer  
377 recent changes in effective population size across each population. For each time-period  
378 described above ( $t$ ),  $N_e$  was estimated given the following expression where  $F_{ROH,t}$   
379 corresponds to the individual inbreeding coefficient at time  $t$ .

$$380 \quad F_{ROH,t} = 1 - \left(1 - \frac{1}{2N_e}\right)^t$$

381 To calculate 95% confidence intervals around our estimates, we randomly resampled 50% of  
382 individuals within each population without replacement 100 times, and recalculated  $N_e$ .

### 383 **Nucleotide diversity**

384 Nucleotide diversity estimates were calculated for each population using ANGSD. We first  
385 estimated the unfolded site-frequency spectrum (SFS) using the -doSaf and -realSFS  
386 commands while restricting the analysis to the 28 chromosome-length autosomes and regions  
387 with Phred quality and mapping scores over 30. Per-site pairwise nucleotide diversity  
388 estimates were then calculated using the -thetaStat command.

### 389 **Identification of deleterious mutations**

390 As most deleterious mutations are likely to be derived alleles, we first polarised our SNP  
391 genotypes as ancestral or derived using the blue wildebeest (*Connochaetes taurinus*), topi  
392 (*Damaliscus lunatus*) and hartebeest (*Alcelaphus buselaphus*) as outgroup species. Short  
393 read sequencing data from one wildebeest (SRR6902709), one topi (SRR6913384) and one

394 hartebeest (SRR6922939 and SRR6922940) were downloaded from NCBI and mapped to the  
395 scimitar-horned oryx reference genome using BWA MEM with the default parameters. The  
396 alignments were then merged using SAMtools. A consensus was generated by selecting the  
397 most common base from the alignment using the doFasta 2 and doCounts 1 options in  
398 ANGSD. We then used PLINK v2.0 to polarise the oryx SNPs in our VCF based on the alleles  
399 in the consensus. First, we removed SNPs from our VCF whose positions were not present in  
400 the consensus sequence. Second, we removed SNPs where the ancestral allele in the  
401 consensus matched neither allele in the VCF file. Finally, we rotated alleles so that the  
402 reference allele in our VCF matched the ancestral allele in the consensus.

403 To identify deleterious mutations, we predicted the functional effects of the polarised SNP  
404 variants using both SnpEff v5.0 (89) and the Variant Effect Predictor v99.2 (90). These  
405 methods compare a set of variants to an annotation database and predict the consequence  
406 of the alternative alleles on genes, transcripts and proteins. Both were run using the NCBI  
407 RefSeq scimitar-horned oryx genome annotation downloaded from:  
408 [https://ftp.ncbi.nlm.nih.gov/genomes/all/annotation\\_releases/59534/100/GCF\\_014754425.2](https://ftp.ncbi.nlm.nih.gov/genomes/all/annotation_releases/59534/100/GCF_014754425.2)  
409 [SCBI Odam 1.1/](#). For each approach, sites with warnings were removed from the VCF file  
410 and SNPs were then categorised as loss of function or missense according to the  
411 classifications provided in Table S2. For each dataset, we also extracted a random subset of  
412 100,000 intergenic SNPs for use in the Rxy analysis below. For each set of SNPs, genotypes  
413 were extracted for all individuals using a combination of VCFtools and PLINK.

#### 414 **Genetic load landscape across management strategies**

415 To assess how the genetic load varies across populations we used two approaches. First, we  
416 approximated two components of genetic load; inbreeding and drift load (48). Inbreeding load  
417 was measured as the total number of heterozygotes per individual for both loss of function  
418 and missense variants. Drift load was measured as the total number of alternative  
419 homozygotes per individual for both loss of function and missense variants. Second, we used  
420 the Rxy statistic to estimate the relative frequency of loss of function and missense mutations  
421 in one population over another (91). Alternative allele frequencies were calculated based on  
422 individuals from managed and unmanaged populations separately. A random subset of  
423 100,000 intergenic SNPs was used to standardise our estimates and account for population-  
424 specific biases. To calculate 95% confidence intervals around our estimates, we randomly  
425 resampled 70% of SNPs within each impact category without replacement and recalculated  
426 Rxy. This was repeated 100 times. To explore the effect of management on genetic load, we  
427 ran linear models with inbreeding or drift load as the response variable and management  
428 strategy as the predictor variable.

## 429 **Data availability**

430 EEP samples are archived at the EAZA Biobank  
431 <https://www.eaza.net/conservation/research/eaza-biobank>. Whole genome resequencing  
432 data will be deposited to the European Nucleotide Archive. Analysis code will be available on  
433 Zenodo and GitHub.

## 434 **Author contributions**

435 RO, HS, AB, KD and EH conceived and designed the study. JC, RP and MaR contributed  
436 materials and funding. BP provided samples from SSP populations. EH analysed the data with  
437 input from MAS and RG. EH wrote the manuscript. All authors commented on and helped  
438 improve the final manuscript.

## 439 **Acknowledgements**

440 We thank the EAD, EAZA and AZA institutions that provided samples for this study. We thank  
441 Jennifer Kaden for initial processing of samples and DNA extraction, and Edinburgh Genomics  
442 for carrying out the whole genome sequencing. SaharaConservation provided materials and  
443 wider project support. We also acknowledge Katerina Guschanski for helpful discussions and  
444 Tania Gilbert at Marwell Wildlife for information on the international studbook of scimitar-  
445 horned oryx.

## 446 **References**

- 447 1. P. J. K. McGowan, K. Traylor-Holzer, K. Leus, IUCN guidelines for determining when and  
448 how ex situ management should be used in species conservation. *Conservation Letters* **10**,  
449 361–366 (2017).
- 450 2. M. Kimura, T. Maruyama, J. F. Crow, The mutation load in small populations. *Genetics* **48**,  
451 1303–1312 (1963).
- 452 3. R. C. Lacy, Loss of genetic diversity from managed populations: interacting effects of drift,  
453 mutation, immigration, selection, and population subdivision. *Conservation Biology* **1**, 143–  
454 158 (1987).
- 455 4. R. Lande, Risk of population extinction from fixation of new deleterious mutations. *Evolution*  
456 **48**, 1460–1469 (1994).
- 457 5. M. Lynch, J. Conery, R. Burger, Mutation accumulation and the extinction of small  
458 populations. *The American Naturalist* **146**, 489–518 (1995).
- 459 6. D. Spielman, B. W. Brook, R. Frankham, Most species are not driven to extinction before  
460 genetic factors impact them. *Proceedings of the National Academy of Sciences of the*  
461 *United States of America* **101**, 15261–15264 (2004).



- 462 7. J. Ballou, R. Lacy, "Identifying genetically important individuals for management of genetic  
463 diversity in pedigreed populations" in *Analytical Methods and Strategies in Small Population*  
464 *Conservation*, (1995).
- 465 8. R. M. Gooley, C. J. Hogg, K. Belov, C. E. Grueber, The effects of group versus intensive  
466 housing on the retention of genetic diversity in insurance populations. *BMC Zool* **3**, 2  
467 (2018).
- 468 9. D. Wildt, *et al.*, Breeding centers, private ranches, and genomics for creating sustainable  
469 wildlife populations. *BioScience* **69**, 928–943 (2019).
- 470 10. R. M. Gooley, *et al.*, Comparison of genomic diversity and structure of sable antelope  
471 (*Hippotragus niger*) in zoos, conservation centers, and private ranches in North America.  
472 *Evolutionary Applications* **13**, 2143–2154 (2020).
- 473 11. M. J. Lott, B. R. Wright, L. F. Kemp, R. N. Johnson, C. J. Hogg, Genetic management of  
474 captive and reintroduced bilby populations. *The Journal of Wildlife Management* **84**, 20–32  
475 (2020).
- 476 12. D. J. Pritchard, J. E. Fa, S. Oldfield, S. R. Harrop, Bring the captive closer to the wild:  
477 redefining the role of *ex situ* conservation. *Oryx* **46**, 18–23 (2012).
- 478 13. K. H. Redford, D. B. Jensen, J. J. Breheny, Integrating the captive and the wild. *Science*  
479 **338**, 1157–1158 (2012).
- 480 14. K. R. Schwartz, E. C. M. Parsons, L. Rockwood, T. C. Wood, Integrating in-situ and ex-situ  
481 data management processes for biodiversity conservation. *Frontiers in Ecology and*  
482 *Evolution* **5** (2017).
- 483 15. R. Ogden, *et al.*, Benefits and pitfalls of captive conservation genetic management:  
484 Evaluating diversity in scimitar-horned oryx to support reintroduction planning. *Biological*  
485 *Conservation* **241**, 108244 (2020).
- 486 16. J. Fernández, M. A. Toro, A. Caballero, Managing individuals' contributions to maximize the  
487 allelic diversity maintained in small, conserved populations. *Conservation Biology* **18**,  
488 1358–1367 (2004).
- 489 17. J. Ballou, *et al.*, "Demographic and genetic management of captive populations" in *Wild*  
490 *Mammals in Captivity: Principles and Techniques for Zoo Management, Second Edition*,  
491 (University of Chicago Press, 2010).
- 492 18. J. Ivy, R. Lacy, "Using molecular methods to improve the genetic management of captive  
493 breeding programs for threatened species" in *Molecular Approaches in Natural Resource*  
494 *Conservation and Management*, (2010).
- 495 19. K. Ralls, P. Sunnucks, R. C. Lacy, R. Frankham, Genetic rescue: A critique of the evidence  
496 supports maximizing genetic diversity rather than minimizing the introduction of putatively  
497 harmful genetic variation. *Biological Conservation* **251**, 108784 (2020).
- 498 20. J. A. DeWoody, A. M. Harder, S. Mathur, J. R. Willoughby, The long-standing significance  
499 of genetic diversity in conservation. *Molecular Ecology* **30**, 4147–4154 (2021).
- 500 21. C. C. Kyriazis, R. K. Wayne, K. E. Lohmueller, Strongly deleterious mutations are a primary  
501 determinant of extinction risk due to inbreeding depression. *Evolution Letters* **5**, 33–47  
502 (2021).

- 503 22. J. C. Teixeira, C. D. Huber, The inflated significance of neutral genetic diversity in  
504 conservation genetics. *Proceedings of the National Academy of Sciences* **118**,  
505 e2015096118 (2021).
- 506 23. M. Kardos, *et al.*, The crucial role of genome-wide genetic variation in conservation.  
507 *Proceedings of the National Academy of Sciences* **118**, e2104642118 (2021).
- 508 24. Y. Xue, *et al.*, Mountain gorilla genomes reveal the impact of long-term population decline  
509 and inbreeding. *Science* **348**, 242–245 (2015).
- 510 25. J. A. Robinson, C. Brown, B. Y. Kim, K. E. Lohmueller, R. K. Wayne, Purging of strongly  
511 deleterious mutations explains long-term persistence and absence of inbreeding  
512 depression in island foxes. *Curr Biol* **28**, 3487–3494 (2018).
- 513 26. J. A. Robinson, *et al.*, Genomic signatures of extensive inbreeding in Isle Royale wolves, a  
514 population on the threshold of extinction. *Science Advances* **5**, eaau0757 (2019).
- 515 27. T. van der Valk, D. Díez-del-Molino, T. Marques-Bonet, K. Guschanski, L. Dalén, Historical  
516 genomes reveal the genomic consequences of recent population decline in eastern gorillas.  
517 *Current Biology* **29**, 165-170.e6 (2019).
- 518 28. J. von Seth, *et al.*, Genomic insights into the conservation status of the world’s last  
519 remaining Sumatran rhinoceros populations. *Nat Commun* **12**, 2393 (2021).
- 520 29. N. Dussex, *et al.*, Population genomics of the critically endangered kākāpō. *Cell Genomics*  
521 **1**, 100002 (2021).
- 522 30. R. Lande, S. Shannon, The role of genetic variation in adaptation and population  
523 persistence in a changing environment. *Evolution* **50**, 434–437 (1996).
- 524 31. I. Saccheri, *et al.*, Inbreeding and extinction in a butterfly metapopulation. *Nature* **392**, 491–  
525 494 (1998).
- 526 32. D. H. Reed, R. Frankham, Correlation between fitness and genetic diversity. *Conservation*  
527 *Biology* **17**, 230–237 (2003).
- 528 33. C. Bozzuto, I. Biebach, S. Muff, A. R. Ives, L. F. Keller, Inbreeding reduces long-term  
529 growth of Alpine ibex populations. *Nat Ecol Evol* **3**, 1359–1364 (2019).
- 530 34. C. Grossen, F. Guillaume, L. F. Keller, D. Croll, Purging of highly deleterious mutations  
531 through severe bottlenecks in Alpine ibex. *Nature Communications* **11**, 1–12 (2020).
- 532 35. M. A. Stoffel, S. E. Johnston, J. G. Pilkington, J. M. Pemberton, Mutation load decreases  
533 with haplotype age in wild Soay sheep. *Evolution Letters* **5**, 187–195 (2021).
- 534 36. S. Mathur, J. A. DeWoody, Genetic load has potential in large populations but is realized in  
535 small inbred populations. *Evol Appl* **14**, 1540–1557 (2021).
- 536 37. A. Khan, *et al.*, Genomic evidence for inbreeding depression and purging of deleterious  
537 genetic variation in Indian tigers. *Proceedings of the National Academy of Sciences* **118**,  
538 e2023018118 (2021).
- 539 38. D. Kleinman-Ruiz, *et al.*, Purging of deleterious burden in the endangered Iberian lynx.  
540 *Proceedings of the National Academy of Sciences* **119**, e2110614119 (2022).
- 541 39. IUCN/SSC, “Guidelines for reintroductions and other conservation translocations. Version  
542 1.0” (2013).

- 543 40. S. Edmands, Between a rock and a hard place: evaluating the relative risks of inbreeding  
544 and outbreeding for conservation and management. *Molecular Ecology* **16**, 463–475  
545 (2007).
- 546 41. A. R. Weeks, *et al.*, Assessing the benefits and risks of translocations in changing  
547 environments: a genetic perspective. *Evolutionary Applications* **4**, 709–725 (2011).
- 548 42. C. J. Hogg, *et al.*, Preserving the demographic and genetic integrity of a single source  
549 population during multiple translocations. *Biological Conservation* **241**, 108318 (2020).
- 550 43. T. Woodfine, T. Gilbert, “The Fall and Rise of the Scimitar-Horned Oryx” in *Antelope*  
551 *Conservation*, (John Wiley & Sons, Ltd, 2016), pp. 280–296.
- 552 44. T. Gilbert, *International studbook for the scimitar-horned oryx Oryx dammah*, Seventeenth  
553 edition (Marwell Wildlife, 2022).
- 554 45. E. Humble, *et al.*, Chromosomal-level genome assembly of the scimitar-horned oryx:  
555 Insights into diversity and demography of a species extinct in the wild. *Molecular Ecology*  
556 *Resources* **20**, 1668–1681 (2020).
- 557 46. I. M. MacLeod, D. M. Larkin, H. A. Lewin, B. J. Hayes, M. E. Goddard, Inferring  
558 demography from runs of homozygosity in whole-genome sequence, with correction for  
559 sequence errors. *Molecular Biology and Evolution* **30**, 2209–2223 (2013).
- 560 47. S. R. Browning, B. L. Browning, Accurate non-parametric estimation of recent effective  
561 population size from segments of identity by descent. *The American Journal of Human*  
562 *Genetics* **97**, 404–418 (2015).
- 563 48. G. Bertorelle, *et al.*, Genetic load: genomic estimates and applications in non-model  
564 animals. *Nat Rev Genet*, 1–12 (2022).
- 565 49. M. Kardos, A. Qvarnström, H. Ellegren, Inferring individual inbreeding and demographic  
566 history from segments of identity by descent in *Ficedula* flycatcher genome sequences.  
567 *Genetics* **205**, 1319–1334 (2017).
- 568 50. E. A. Thompson, Identity by descent: variation in meiosis, across genomes, and in  
569 populations. *Genetics* **194**, 301–326 (2013).
- 570 51. R. McQuillan, *et al.*, Runs of homozygosity in European populations. *The American Journal*  
571 *of Human Genetics* **83**, 359–372 (2008).
- 572 52. M. Kirin, *et al.*, Genomic runs of homozygosity record population history and consanguinity.  
573 *PLoS ONE* **5**, e13996 (2010).
- 574 53. T. J. Pemberton, *et al.*, Genomic patterns of homozygosity in worldwide human  
575 populations. *The American Journal of Human Genetics* **91**, 275–292 (2012).
- 576 54. M. Kardos, G. Luikart, F. W. Allendorf, Measuring individual inbreeding in the age of  
577 genomics: marker-based measures are better than pedigrees. *Heredity* **115**, 63–72 (2015).
- 578 55. H. Ringbauer, J. Novembre, M. Steinrücken, Parental relatedness through time revealed by  
579 runs of homozygosity in ancient DNA. *Nat Commun* **12**, 5425 (2021).
- 580 56. D. Charlesworth, B. Charlesworth, Inbreeding depression and its evolutionary  
581 consequences. *Annual Review of Ecology & Systematics* **18**, 237–268 (1987).

- 582 57. M. C. Whitlock, Selection, load and inbreeding depression in a large metapopulation.  
583 *Genetics* **160**, 1191–1202 (2002).
- 584 58. L. N. Tracy, G. P. Wallis, M. G. Efford, I. G. Jamieson, Preserving genetic diversity in  
585 threatened species reintroductions: how many individuals should be released? *Animal*  
586 *Conservation* **14**, 439–446 (2011).
- 587 59. A. R. Whiteley, S. W. Fitzpatrick, W. C. Funk, D. A. Tallmon, Genetic rescue to the rescue.  
588 *Trends in Ecology & Evolution* **30**, 42–49 (2015).
- 589 60. R. Frankham, Genetic rescue of small inbred populations: meta-analysis reveals large and  
590 consistent benefits of gene flow. *Molecular Ecology* **24**, 2610–2618 (2015).
- 591 61. R. Frankham, Genetic rescue benefits persist to at least the F3 generation, based on a  
592 meta-analysis. *Biological Conservation* **195**, 33–36 (2016).
- 593 62. J. Wang, W. G. Hill, Effect of selection against deleterious mutations on the decline in  
594 heterozygosity at neutral loci in closely inbreeding populations. *Genetics* **153**, 1475–1489  
595 (1999).
- 596 63. A. García-Dorado, Understanding and predicting the fitness decline of shrunk populations:  
597 inbreeding, purging, mutation, and standard selection. *Genetics* **190**, 1461–1476 (2012).
- 598 64. B. Charlesworth, Mutational load, inbreeding depression and heterosis in subdivided  
599 populations. *Molecular Ecology* **27**, 4991–5003 (2018).
- 600 65. R. C. Lacy, J. D. Ballou, Effectiveness of selection in reducing the genetic load in  
601 populations of *Peromyscus polionotus* during generations of inbreeding. *Evolution* **52**, 900–  
602 909 (1998).
- 603 66. R. Frankham, D. M. Gilligan, D. Morris, D. A. Briscoe, Inbreeding and extinction: Effects of  
604 purging. *Conservation Genetics* **2**, 279–284 (2001).
- 605 67. M. A. Stoffel, S. E. Johnston, J. G. Pilkington, J. M. Pemberton, Genetic architecture and  
606 lifetime dynamics of inbreeding depression in a wild mammal. *Nat Commun* **12**, 2972  
607 (2021).
- 608 68. K. Mertes, *et al.*, Management background and release conditions structure post-release  
609 movements in reintroduced ungulates. *Front. Ecol. Evol.* **7** (2019).
- 610 69. M. E. Montgomery, *et al.*, Minimizing kinship in captive breeding programs. *Zoo Biology* **16**,  
611 377–389 (1997).
- 612 70. M. Pickup, D. L. Field, D. M. Rowell, A. G. Young, Source population characteristics affect  
613 heterosis following genetic rescue of fragmented plant populations. *Proceedings of the*  
614 *Royal Society B: Biological Sciences* **280**, 20122058 (2013).
- 615 71. R. Frankham, *et al.*, *Genetic management of fragmented animal and plant populations*  
616 (Oxford University Press, 2017) <https://doi.org/10.1093/oso/9780198783398.001.0001>  
617 (March 21, 2022).
- 618 72. M. Ørsted, A. A. Hoffmann, E. Sverrisdóttir, K. L. Nielsen, T. N. Kristensen, Genomic  
619 variation predicts adaptive evolutionary responses better than population bottleneck history.  
620 *PLOS Genetics* **15**, e1008205 (2019).
- 621 73. M. Kardos, A. B. A. Shafer, The peril of gene-targeted conservation. *Trends in Ecology &*  
622 *Evolution* **33**, 827–839 (2018).

- 623 74. S. Andrews, *FastQC: A quality control tool for high throughput sequence data*. Available  
624 online at: <http://www.bioinformatics.babraham.ac.uk/projects/fastqc/> (2010).
- 625 75. M. Martin, Cutadapt removes adapter sequences from high-throughput sequencing reads.  
626 *EMBnet.journal* **17**, 10–12 (2011).
- 627 76. H. Li, Aligning sequence reads, clone sequences and assembly contigs with BWA-MEM.  
628 *arXiv* (2013).
- 629 77. H. Li, *et al.*, The Sequence Alignment/Map format and SAMtools. *Bioinformatics* **25**, 2078–  
630 2079 (2009).
- 631 78. R. N. Lou, N. O. Therkildsen, Batch effects in population genomic studies with low-  
632 coverage whole genome sequencing data: Causes, detection and mitigation. *Molecular*  
633 *Ecology Resources* **22**, 1678–1692 (2022).
- 634 79. G. A. Van der Auwera, *et al.*, From FastQ data to high confidence variant calls: the  
635 Genome Analysis Toolkit best practices pipeline. *Curr Protoc Bioinformatics* **43**, 11.10.1-  
636 11.10.33 (2013).
- 637 80. H. Li, A statistical framework for SNP calling, mutation discovery, association mapping and  
638 population genetical parameter estimation from sequencing data. *Bioinformatics* **27**, 2987–  
639 2993 (2011).
- 640 81. P. Danecek, *et al.*, The variant call format and VCFtools. *Bioinformatics* **27**, 2156–2158  
641 (2011).
- 642 82. L. Skotte, T. S. Korneliussen, A. Albrechtsen, Estimating individual admixture proportions  
643 from next generation sequencing data. *Genetics* **195**, 693–702 (2013).
- 644 83. J. Meisner, A. Albrechtsen, Inferring population structure and admixture proportions in low-  
645 depth NGS data. *Genetics* **210**, 719–731 (2018).
- 646 84. T. S. Korneliussen, A. Albrechtsen, R. Nielsen, ANGSD: Analysis of Next Generation  
647 Sequencing Data. *BMC Bioinformatics* **15**, 356 (2014).
- 648 85. J. K. Pritchard, M. Stephens, P. Donnelly, Inference of population structure using multilocus  
649 genotype data. *Genetics* **155**, 945–959 (2000).
- 650 86. G. Evanno, S. Regnaut, J. Goudet, Detecting the number of clusters of individuals using the  
651 software structure: a simulation study. *Molecular Ecology* **14**, 2611–2620 (2005).
- 652 87. S. Purcell, *et al.*, PLINK: a tool set for whole-genome association and population-based  
653 linkage analyses. *The American Journal of Human Genetics* **81**, 559–575 (2007).
- 654 88. E. F. Mouresan, *et al.*, Mapping recombination rate on the autosomal chromosomes based  
655 on the persistency of linkage disequilibrium phase among autochthonous beef cattle  
656 populations in Spain. *Frontiers in Genetics* **10** (2019).
- 657 89. P. Cingolani, *et al.*, A program for annotating and predicting the effects of single nucleotide  
658 polymorphisms, SnpEff: SNPs in the genome of *Drosophila melanogaster* strain w1118;  
659 iso-2; iso-3. *Fly (Austin)* **6**, 80–92 (2012).
- 660 90. W. McLaren, *et al.*, The Ensembl Variant Effect Predictor. *Genome Biology* **17**, 122 (2016).
- 661 91. R. Do, *et al.*, No evidence that selection has been less effective at removing deleterious  
662 mutations in Europeans than in Africans. *Nat Genet* **47**, 126–131 (2015).
